# Supplementary material for: Using Qualitative Evidence in Decision Making for Health and Social Interventions: An Approach to Assess Confidence in Findings from Qualitative Evidence Syntheses (GRADE-CERQual)
Source: PLOS journal article supplement (doi:10.1371/journal.pmed.1001895), 2015-10-27
Supplement: S2 (10.1371/journal.pmed.1001895.s002) [file journal.pmed.1001895.s002]

**Supplementary table 2: Comparison of the CERQual components and the elements of GRADE**

| <b>CERQual components for assessing confidence in the evidence for findings from syntheses of qualitative evidence</b> | <b>GRADE elements for assessing the certainty of evidence, by outcome, on the effectiveness of interventions [1]</b> |
|------------------------------------------------------------------------------------------------------------------------|----------------------------------------------------------------------------------------------------------------------|
| Methodological limitations                                                                                             | Limitations in study design / risk of bias                                                                           |
| Relevance                                                                                                              | Indirectness                                                                                                         |
| Coherence                                                                                                              | Inconsistency                                                                                                        |
| Adequacy of data                                                                                                       | Imprecision                                                                                                          |
| <i>Dissemination bias*</i>                                                                                             | Publication bias                                                                                                     |

\* The inclusion of dissemination bias in CERQual is still under discussion – see Boxes 2 and 4

## References

1. Balshem H, Helfand M, Schunemann HJ, Oxman AD, Kunz R, et al. (2011) GRADE guidelines: 3. Rating the quality of evidence. J Clin Epidemiol 64: 401-406.
